# Supplementary material for: Ionic liquid post-modified carboxylate-rich MOFs for efficient catalytic CO2 cycloaddition under solvent-free conditions
Source: Royal Society of Chemistry journal article supplement (doi:10.1039/d4dt00209a), 2024-01-01
Supplement: d4dt00209a1.pdf [file d4dt00209a1.pdf]

## Supporting Information

# Ionic liquid post-modified carboxylate-rich MOFs for efficiently catalytic CO<sub>2</sub> cycloaddition under solvent-free conditions

Wen-Li Bao,<sup>a</sup> Jie Kuai,<sup>a</sup> Hai-Yang Gao,<sup>a</sup> Meng-Qi Zheng,<sup>a</sup> Zhong-Hua Sun,<sup>\*a</sup>

Ming-Yang He,<sup>a</sup> Qun Chen<sup>a</sup> and Zhi-Hui Zhang<sup>\*a</sup>

<sup>†</sup>Jiangsu Key Laboratory of Advanced Catalytic Materials and Technology

Advanced Catalysis and Green Manufacturing Collaborative Innovation Center

Changzhou University, Changzhou 213164, P. R. China. E-mail:

[sunzhonghua@cczu.edu.cn](mailto:sunzhonghua@cczu.edu.cn), [zhangzh@cczu.edu.cn](mailto:zhangzh@cczu.edu.cn).

## Products characterization

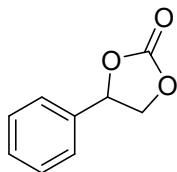

### 4-phenyl-1,3-dioxolan-2-one (1b)

$^1\text{H NMR}$  (300 MHz,  $\text{CDCl}_3$ )  $\delta$  7.57 – 7.15 (m, 5H), 5.95 – 5.41 (td,  $J = 8.0, 1.8$  Hz, 1H), 4.97 – 4.61 (td,  $J = 8.5, 2.2$  Hz, 1H), 4.42 – 4.15 (td,  $J = 8.2, 2.6$  Hz, 1H).

$^{13}\text{C NMR}$  (75 MHz,  $\text{CDCl}_3$ )  $\delta$  155.08 (d,  $J = 1.5$  Hz), 135.94 (d,  $J = 1.7$  Hz), 129.68, 129.20, 126.05, 78.10, 71.24.

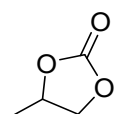

### 4-methyl-1,3-dioxolan-2-one (2b)

$^1\text{H NMR}$  (300 MHz,  $\text{CDCl}_3$ )  $\delta$  4.83 (h,  $J = 6.7$  Hz, 1H), 4.65 – 4.32 (m, 1H), 4.20 – 3.76 (m, 1H), 1.44 (d,  $J = 6.3$ , 3H).

$^{13}\text{C NMR}$  (75 MHz,  $\text{CDCl}_3$ )  $\delta$  151.46, 69.97, 67.01, 15.66.

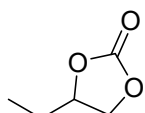

### 4-ethyl-1,3-dioxolan-2-one (3b)

$^1\text{H NMR}$  (300 MHz,  $\text{CDCl}_3$ )  $\delta$  4.68 – 4.59 (m, 1H), 4.49 (t,  $J = 8.2$  Hz, 1H), 4.04 (ddd,  $J = 8.3, 7.0, 1.0$  Hz, 1H), 1.73 (dddd,  $J = 16.0, 14.7, 7.3, 5.9$  Hz, 2H), 0.97 (tt,  $J = 7.4, 1.4$  Hz, 3H).

$^{13}\text{C NMR}$  (75 MHz,  $\text{CDCl}_3$ )  $\delta$  151.46, 74.33, 65.30, 23.04, 4.63.

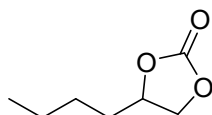

### 4-butyl-1,3-dioxolan-2-one (4b)

$^1\text{H NMR}$  (300 MHz,  $\text{CDCl}_3$ )  $\delta$  4.33 (qd,  $J = 7.5, 5.5$  Hz, 1H), 4.15 (t,  $J = 8.1$  Hz, 1H), 3.73 – 3.64 (m, 1H), 1.48 – 1.25 (m, 2H), 1.09 – 0.90 (m, 4H), 0.52 (t,  $J = 7.0$  Hz, 3H).

$^{13}\text{C NMR}$  (75 MHz,  $\text{CDCl}_3$ )  $\delta$  151.58, 73.53, 65.82, 29.84, 22.77, 18.58, 10.14.

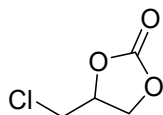

### 4-(chloromethyl)-1,3-dioxolan-2-one (5b)

$^1\text{H NMR}$  (300 MHz,  $\text{CDCl}_3$ )  $\delta$  4.81 – 4.57 (m, 1H), 4.24 (t,  $J = 8.6$  Hz, 1H), 4.05 (dd,  $J = 8.9, 5.7$  Hz, 1H), 3.54 – 3.30 (m, 2H).

$^{13}\text{C NMR}$  (75 MHz,  $\text{CDCl}_3$ )  $\delta$  151.49, 71.45, 63.97, 41.07.

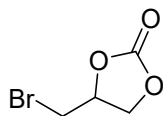

### 4-(bromomethyl)-1,3-dioxolan-2-one (6b)

$^1\text{H NMR}$  (300 MHz,  $\text{CDCl}_3$ )  $\delta$  4.84 – 4.60 (m, 1H), 4.32 (t,  $J = 8.6$  Hz, 1H), 4.06 (t,  $J = 8.9, 5.9$  Hz, 1H), 3.47 – 3.18 (m, 2H).

$^{13}\text{C NMR}$  (75 MHz,  $\text{CDCl}_3$ )  $\delta$  151.42, 71.09, 65.10, 29.15.

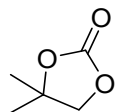

**4,4-dimethyl-1,3-dioxolan-2-one (7b)**

$^1\text{H NMR}$  (300 MHz,  $\text{CDCl}_3$ )  $\delta$  4.02 (s,  $J = 8.4, 7.1$  Hz, 2H), 1.57 (s,  $J = 1.1$  Hz, 6H).

$^{13}\text{C NMR}$  (75 MHz,  $\text{CDCl}_3$ )  $\delta$  155.31, 82.10, 75.55, 25.89.

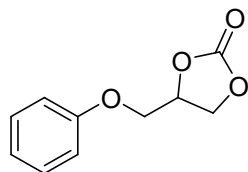

**4-(phoxymethyl)-1,3-dioxolan-2-one (8b)**

$^1\text{H NMR}$  (300 MHz,  $\text{CDCl}_3$ )  $\delta$  7.30 – 7.19 (q, 2H), 6.99 – 6.79 (m, 3H), 4.95 (dq,  $J = 9.5, 6.0, 3.6$  Hz, 1H), 4.69 – 4.35 (m, 2H), 4.10 (m,  $J = 35.9, 10.7, 3.6$  Hz, 2H).

$^{13}\text{C NMR}$  (75 MHz,  $\text{CDCl}_3$ )  $\delta$  153.40, 150.52, 125.32, 117.53, 110.21, 69.94, 62.46, 61.82.

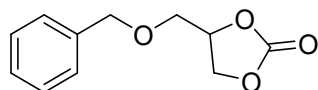

**4-((benzyloxy)methyl)-1,3-dioxolan-2-one (9b)**

$^1\text{H NMR}$  (300 MHz,  $\text{CDCl}_3$ )  $\delta$  7.27 – 7.15 (m, 5H), 4.64 (ddt,  $J = 9.1, 6.6, 3.4$  Hz, 1H), 4.42 (d,  $J = 3.5$  Hz, 2H), 4.32 – 4.12 (m, 2H), 3.62 – 3.32 (m, 2H).

$^{13}\text{C NMR}$  (75 MHz,  $\text{CDCl}_3$ )  $\delta$  152.76, 134.89, 125.40, 125.13, 72.82, 70.84, 66.45, 63.69.

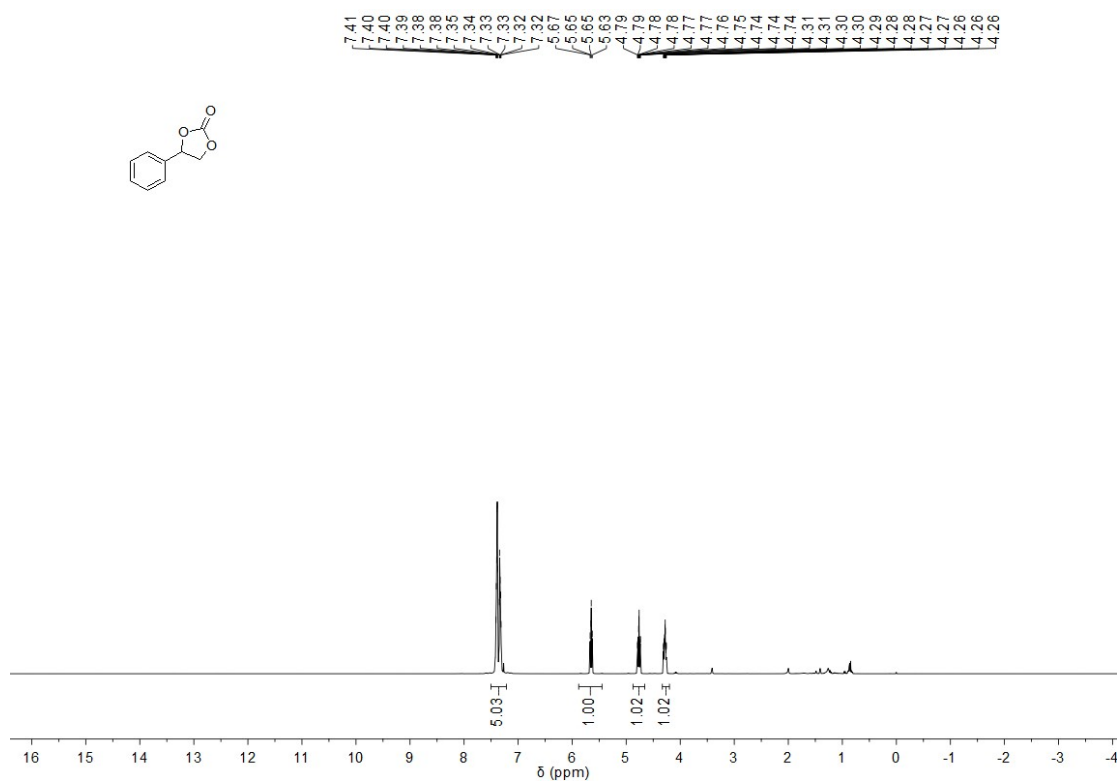

Figure S1  $^1\text{H NMR}$  of 4-phenyl-1,3-dioxolan-2-one (1b)

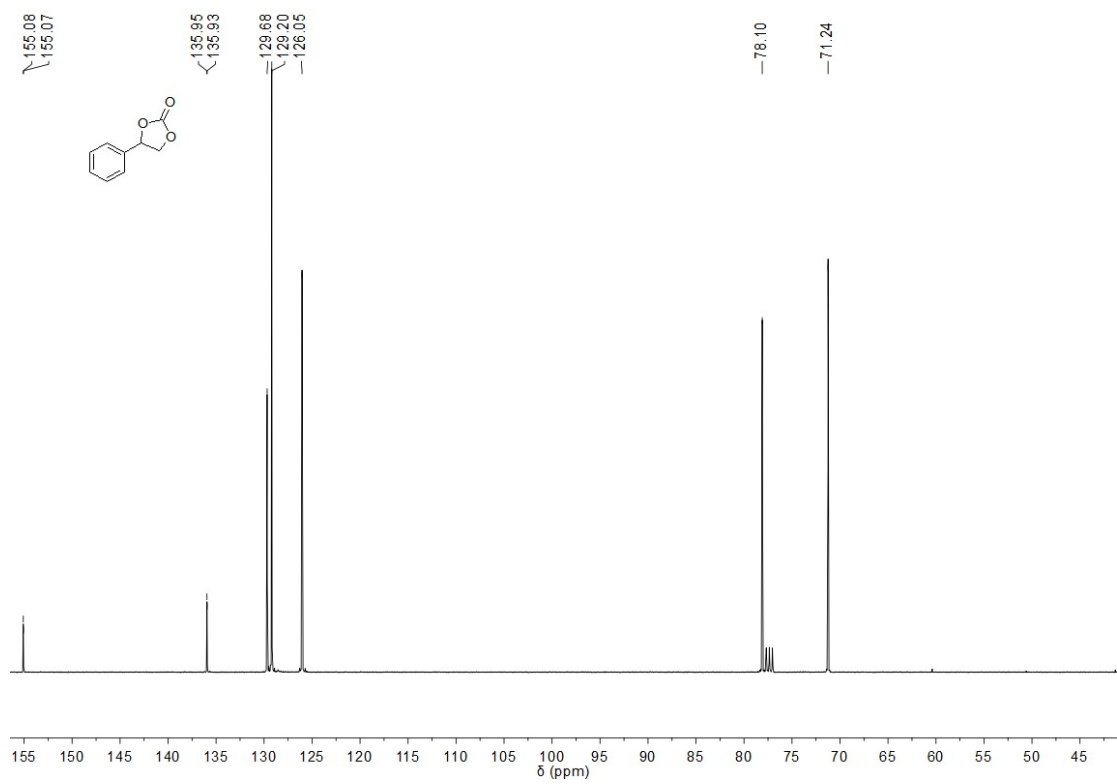

Figure S2  $^{13}\text{C NMR}$  of 4-phenyl-1,3-dioxolan-2-one (1b)

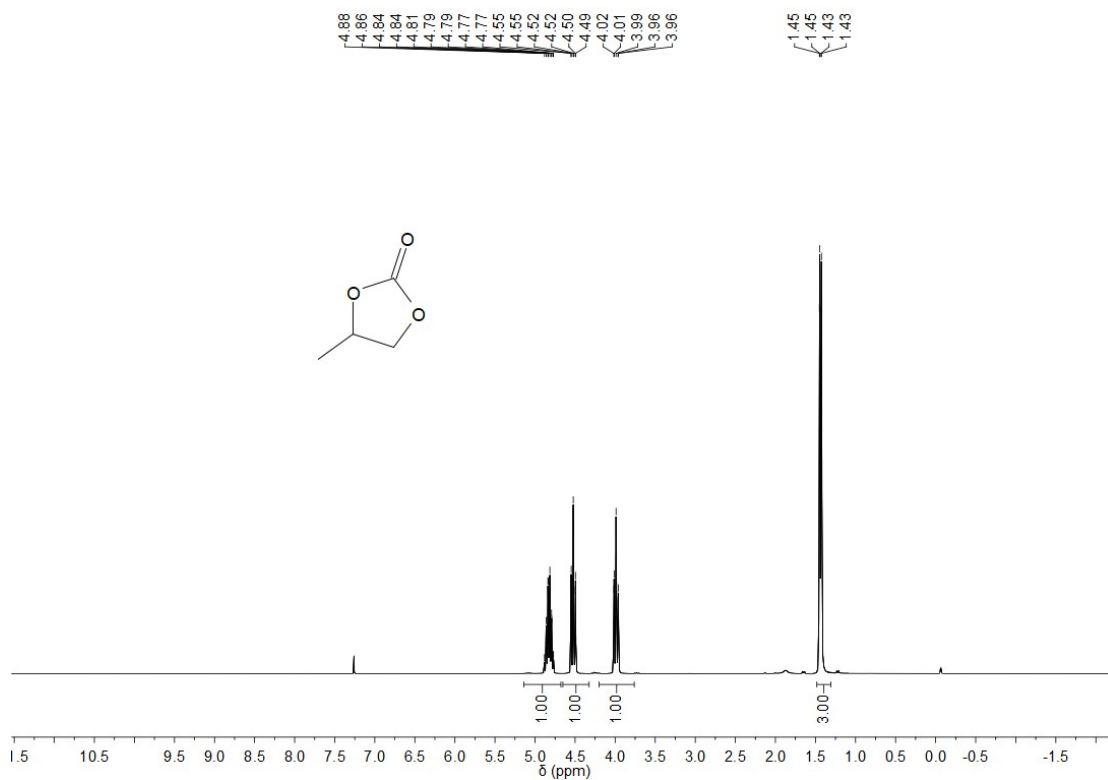

Figure S3  $^1\text{H}$  NMR of 4-methyl-1,3-dioxolan-2-one (2b)

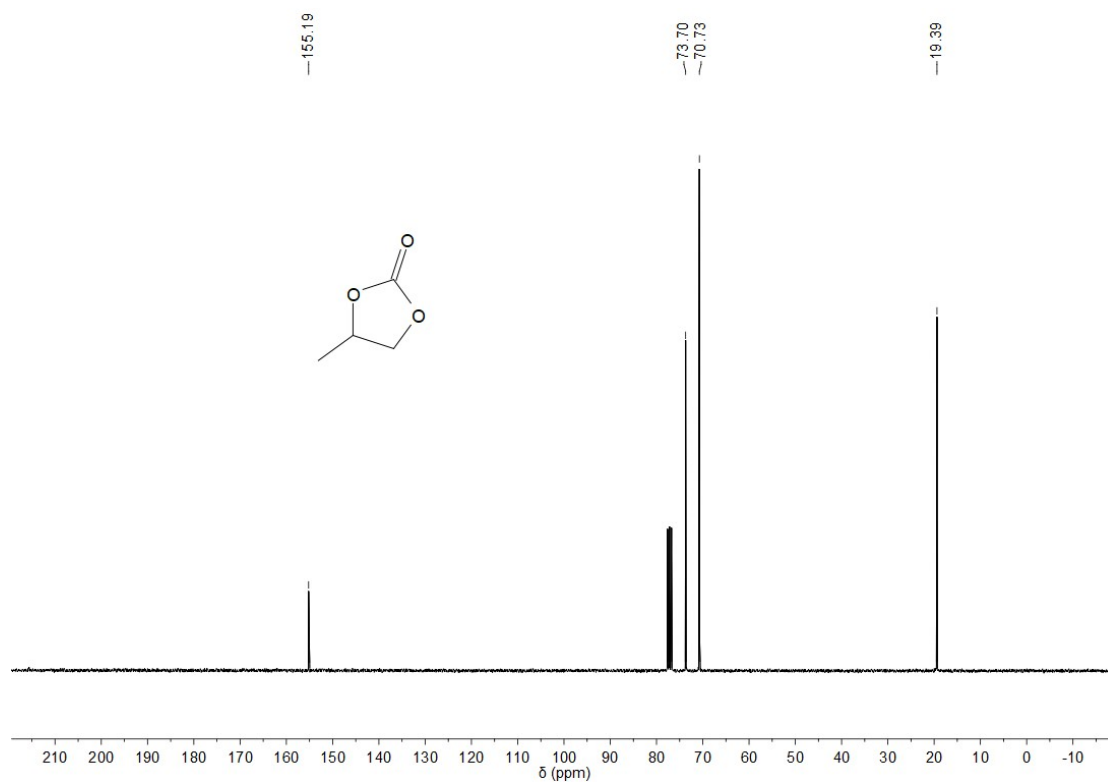

Figure S4  $^{13}\text{C}$  NMR of 4-methyl-1,3-dioxolan-2-one (2b)

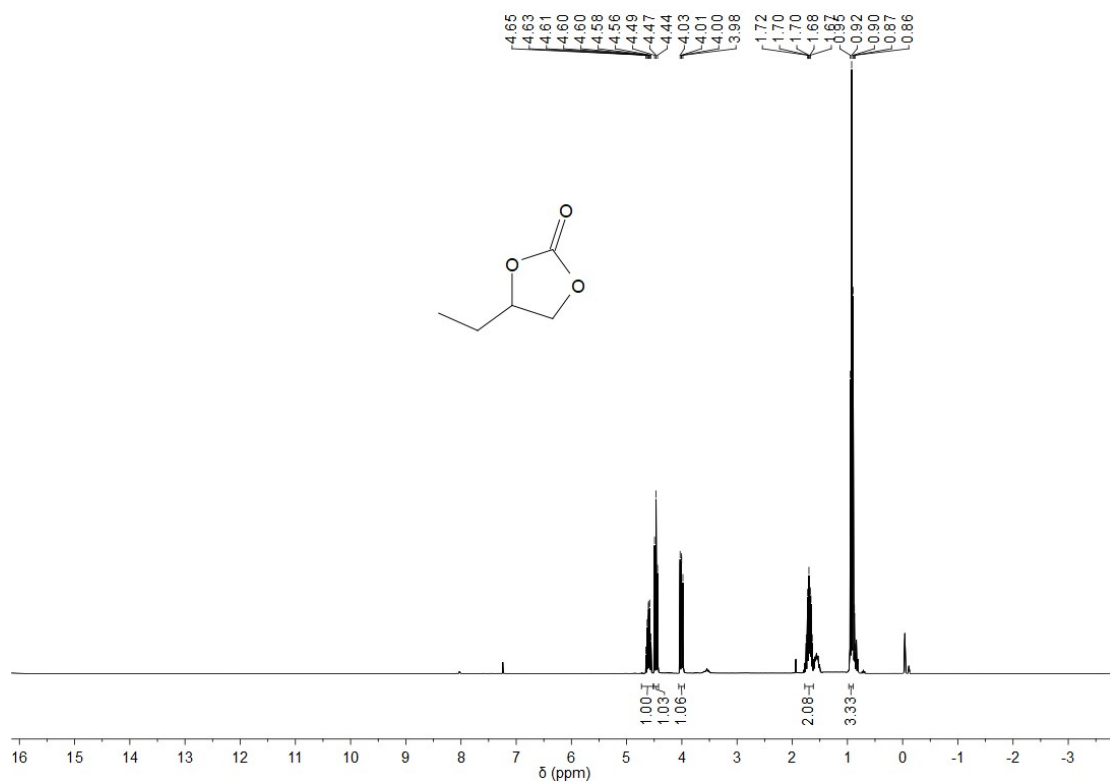

Figure S5 <sup>1</sup>H NMR of 4-ethyl-1,3-dioxolan-2-one (3b)

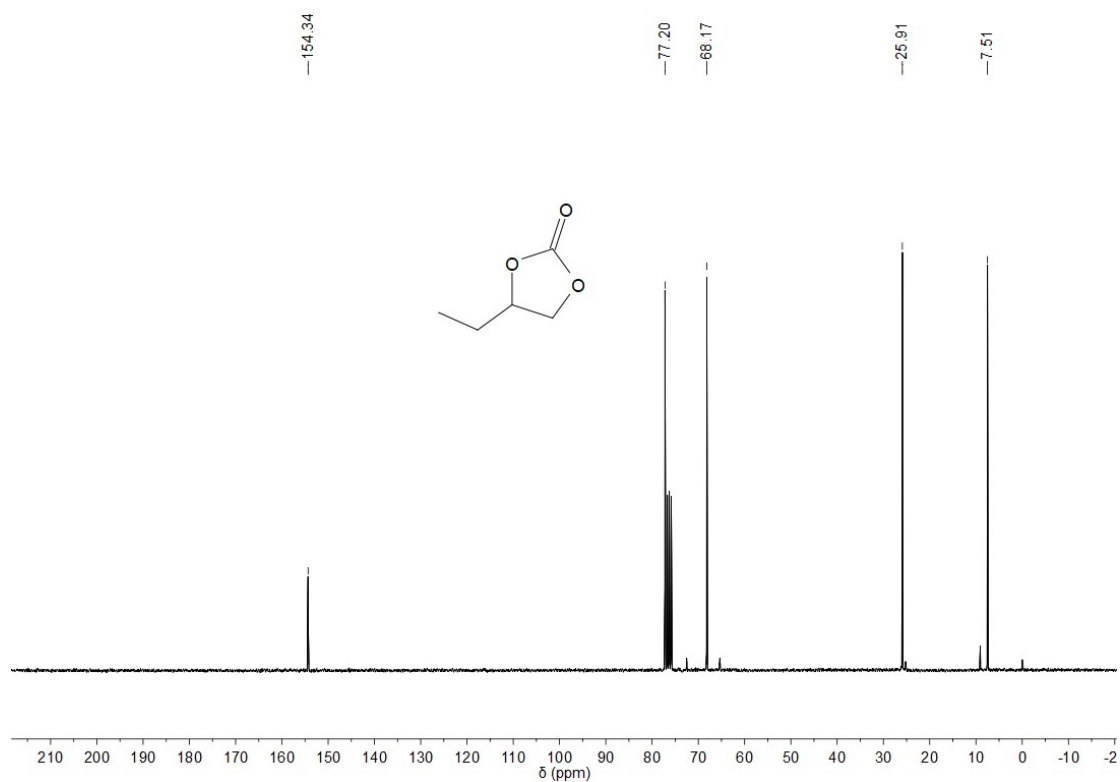

Figure S6 <sup>13</sup>C NMR of 4-ethyl-1,3-dioxolan-2-one (3b)

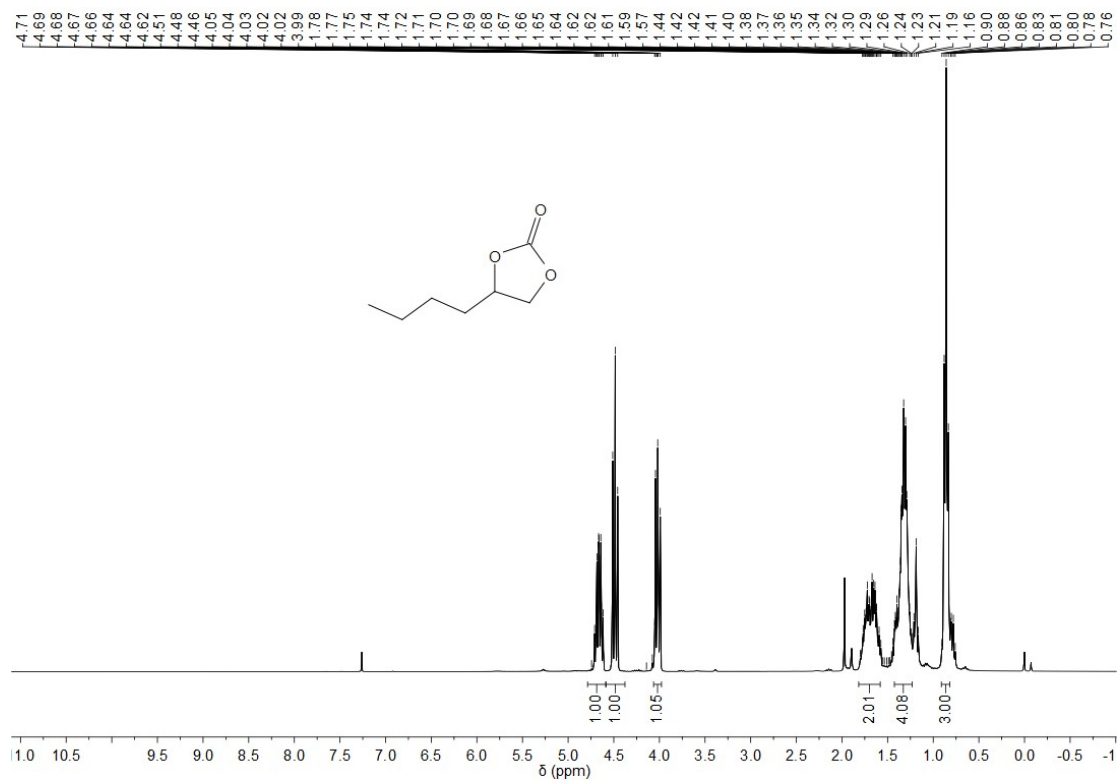

Figure S7  $^1\text{H NMR}$  of 4-butyl-1,3-dioxolan-2-one (4b)

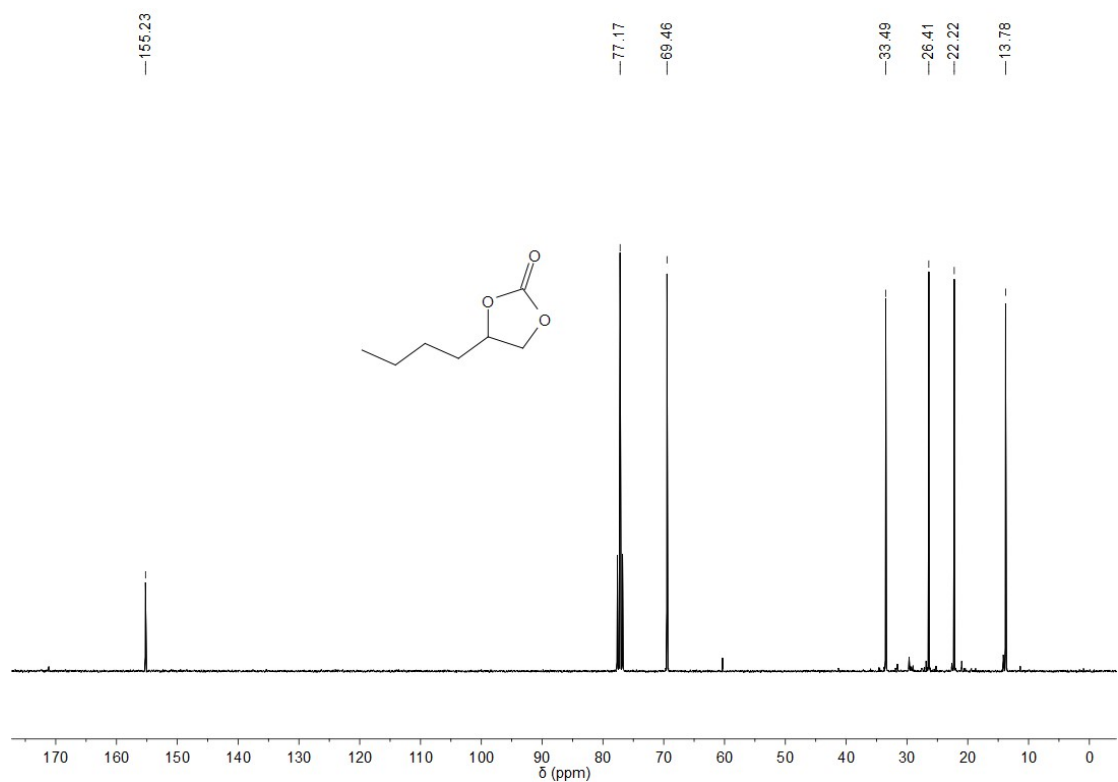

Figure S8  $^{13}\text{C NMR}$  of 4-butyl-1,3-dioxolan-2-one (4b)

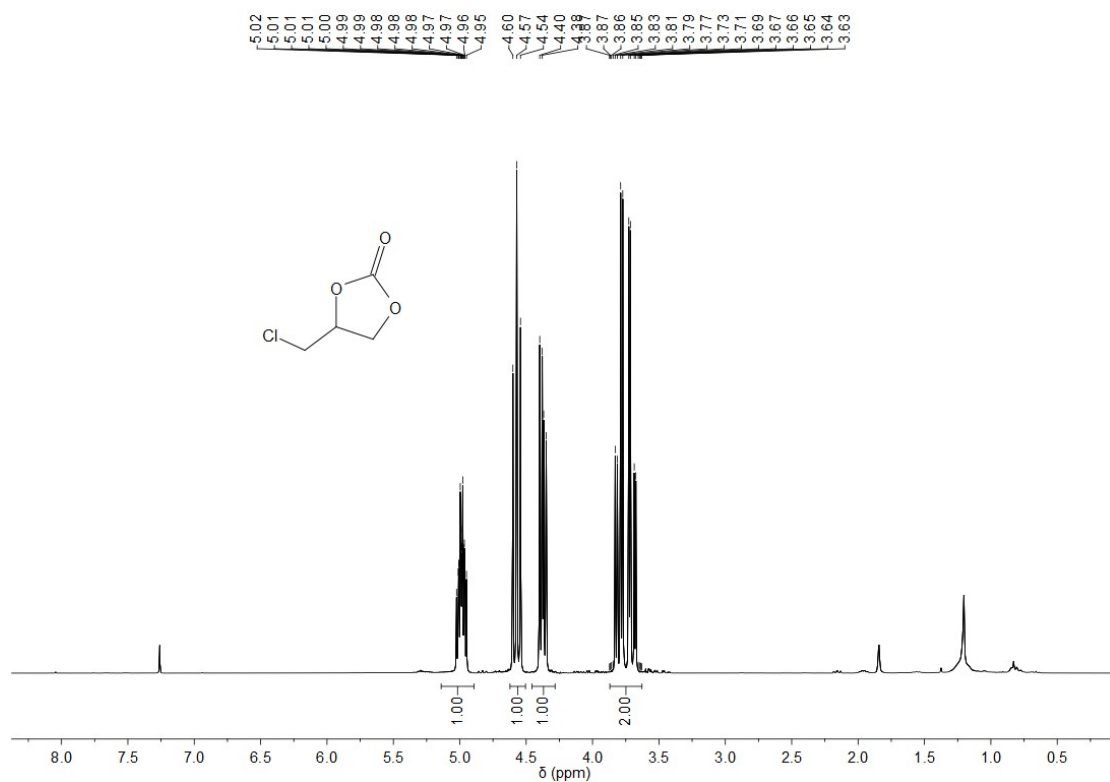

Figure S9  $^1\text{H NMR}$  of 4-(chloromethyl)-1,3-dioxolan-2-one (5b)

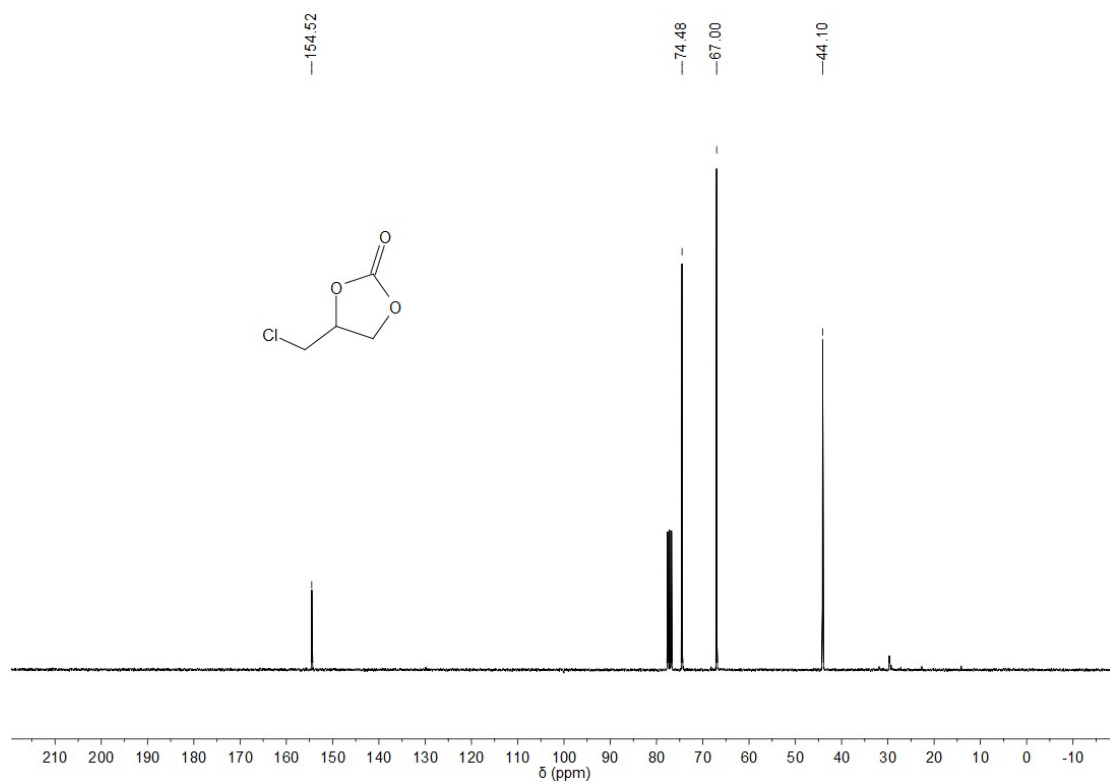

Figure S10  $^{13}\text{C NMR}$  of 4-(chloromethyl)-1,3-dioxolan-2-one (5b)



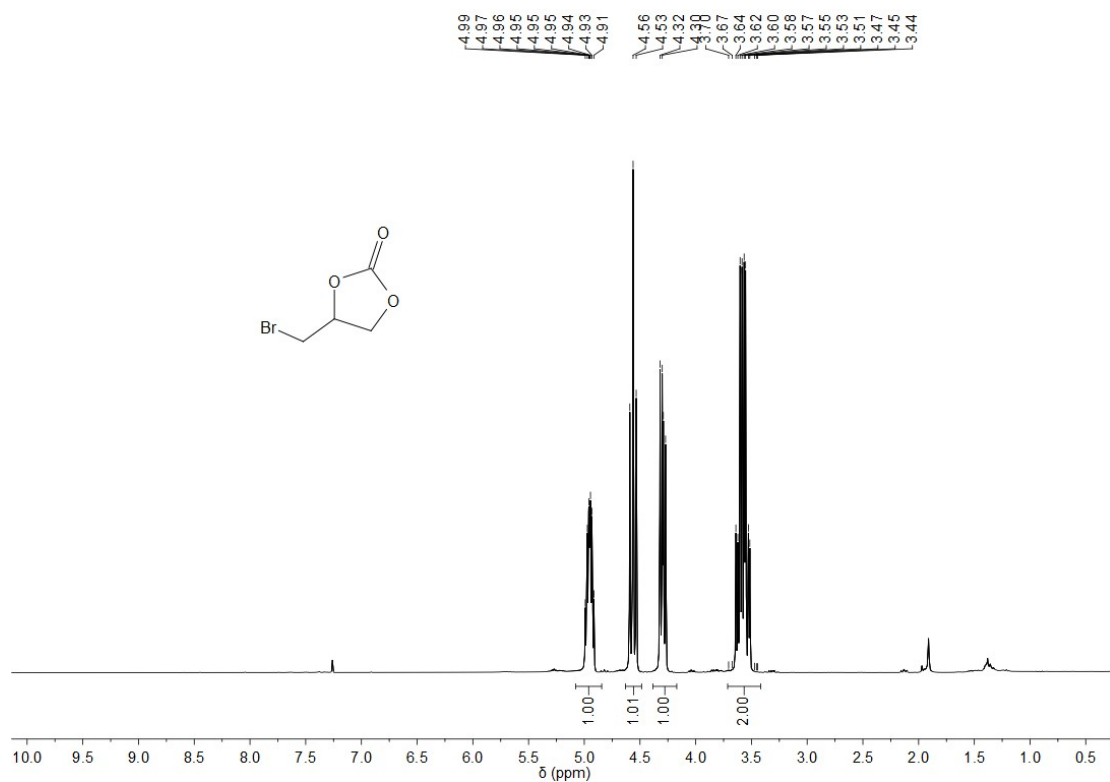

Figure S11  $^1\text{H NMR}$  of 4-(bromomethyl)-1,3-dioxolan-2-one (6b)

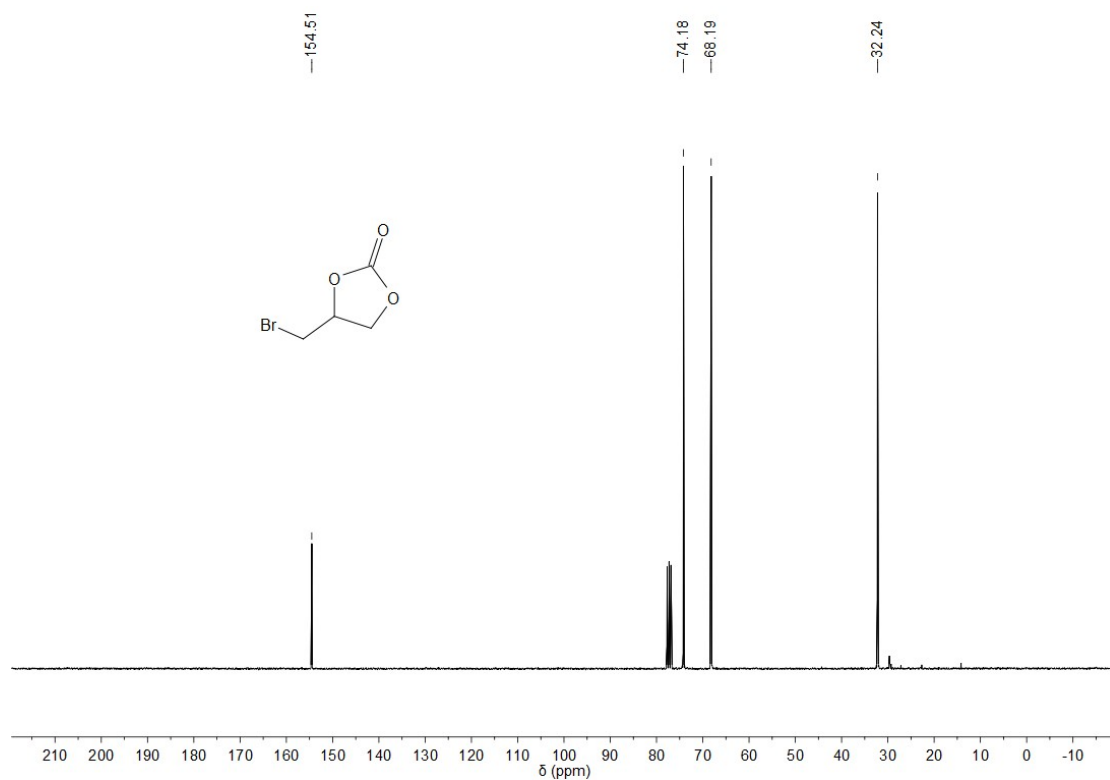

Figure S12  $^{13}\text{C NMR}$  of 4-(bromomethyl)-1,3-dioxolan-2-one (6b)

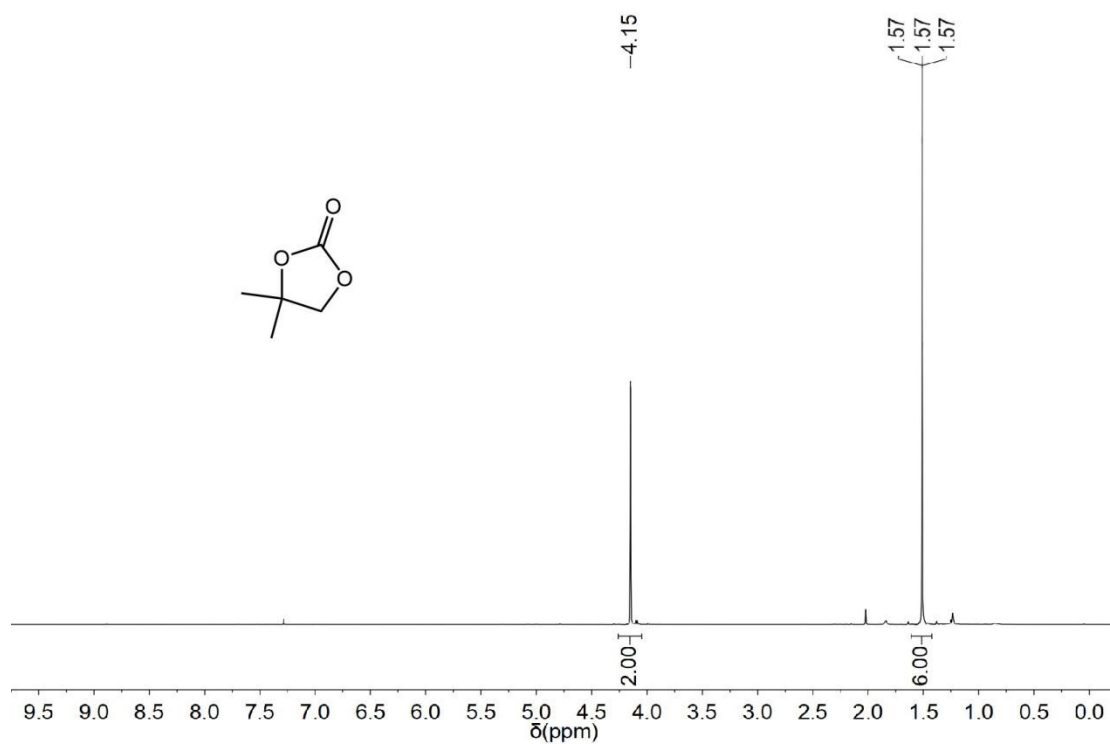

Figure S13  $^1\text{H NMR}$  of 4,4-dimethyl-1,3-dioxolan-2-one (7b)

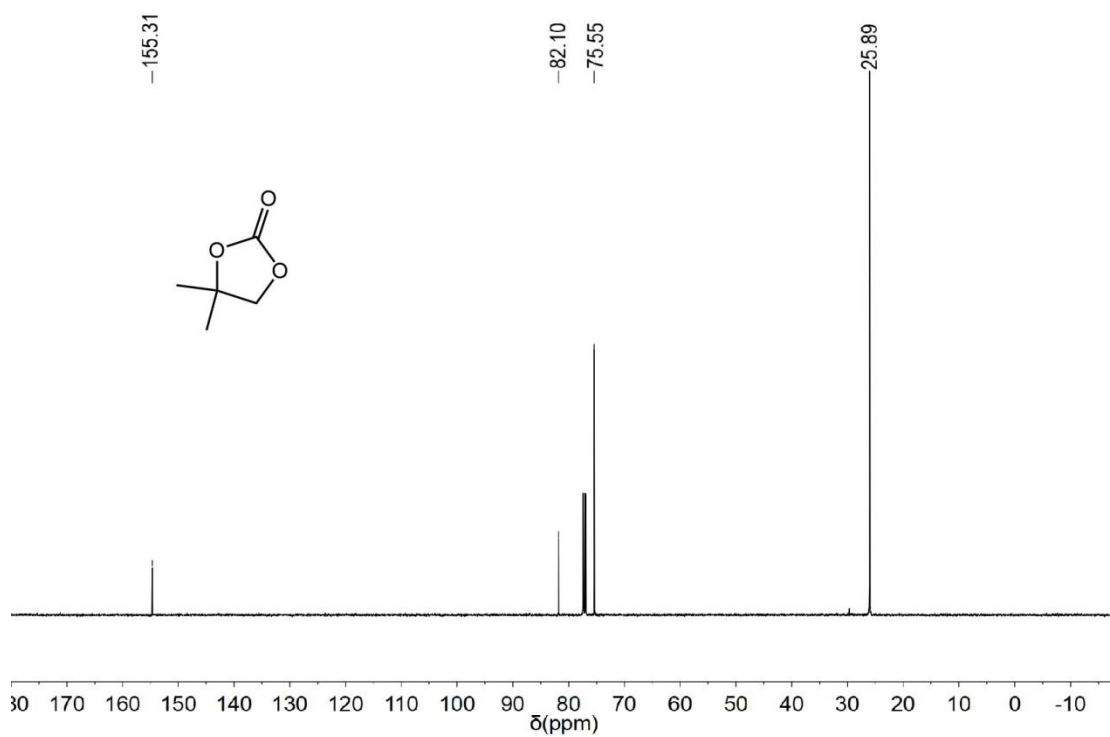

Figure S14  $^{13}\text{C NMR}$  of 4,4-dimethyl-1,3-dioxolan-2-one (7b)

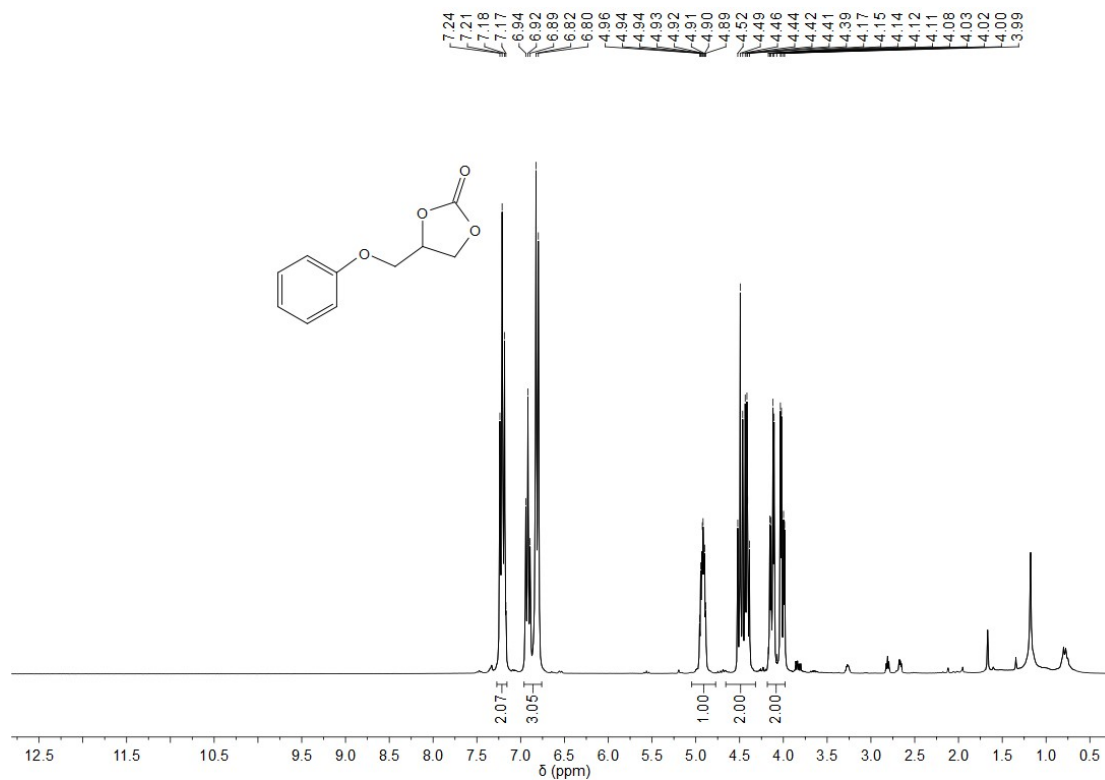

Figure S15 <sup>1</sup>H NMR of 4-(phoxymethyl)-1,3-dioxolan-2-one (8b)

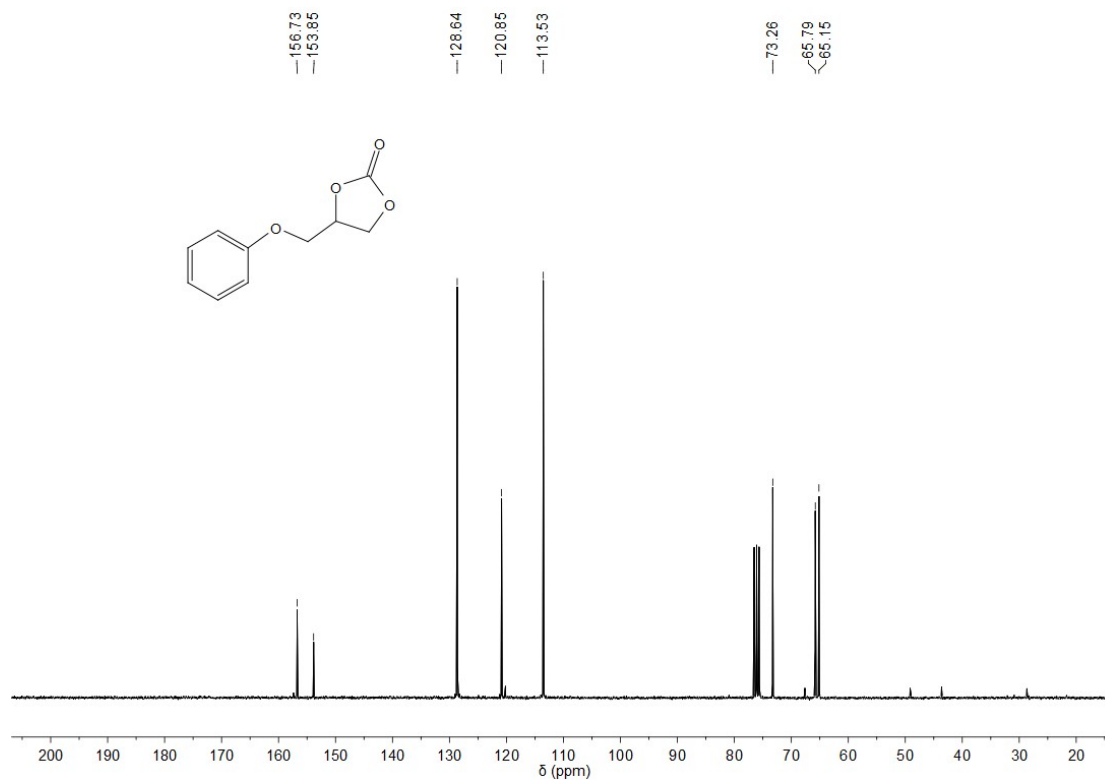

Figure S16 <sup>13</sup>C NMR of 4-(phoxymethyl)-1,3-dioxolan-2-one (8b)

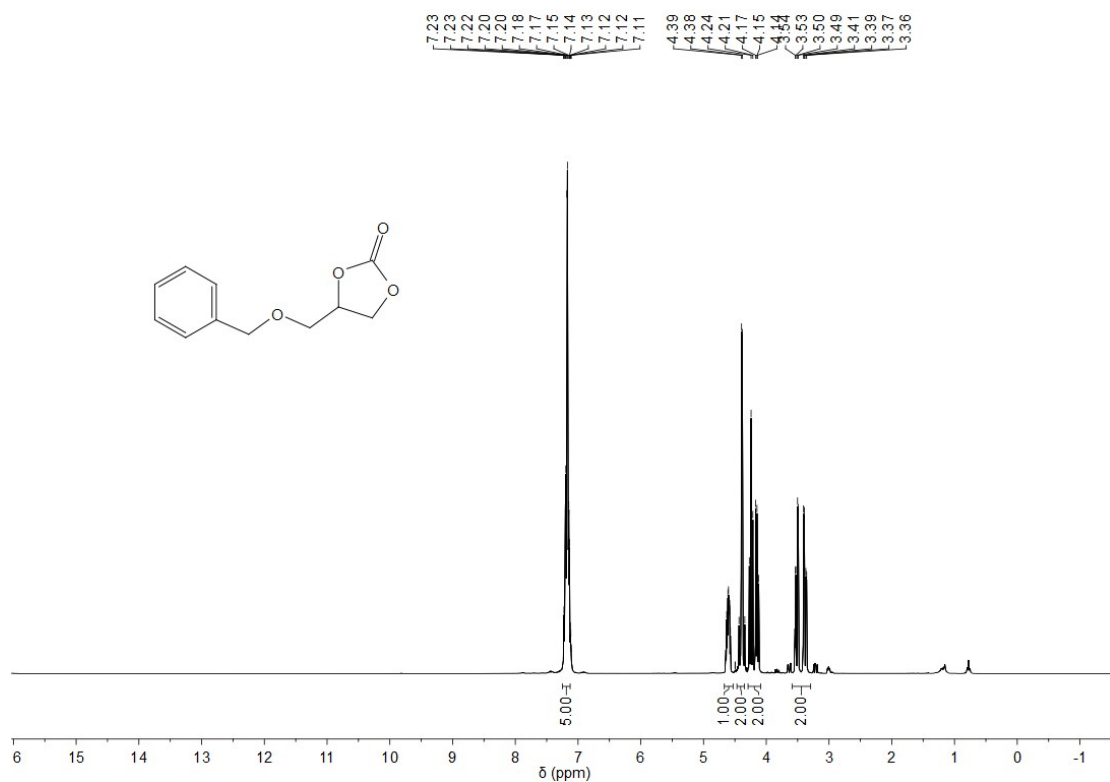

Figure S17 <sup>1</sup>H NMR of 4-((benzyloxy)methyl)-1,3-dioxolan-2-one (9b)

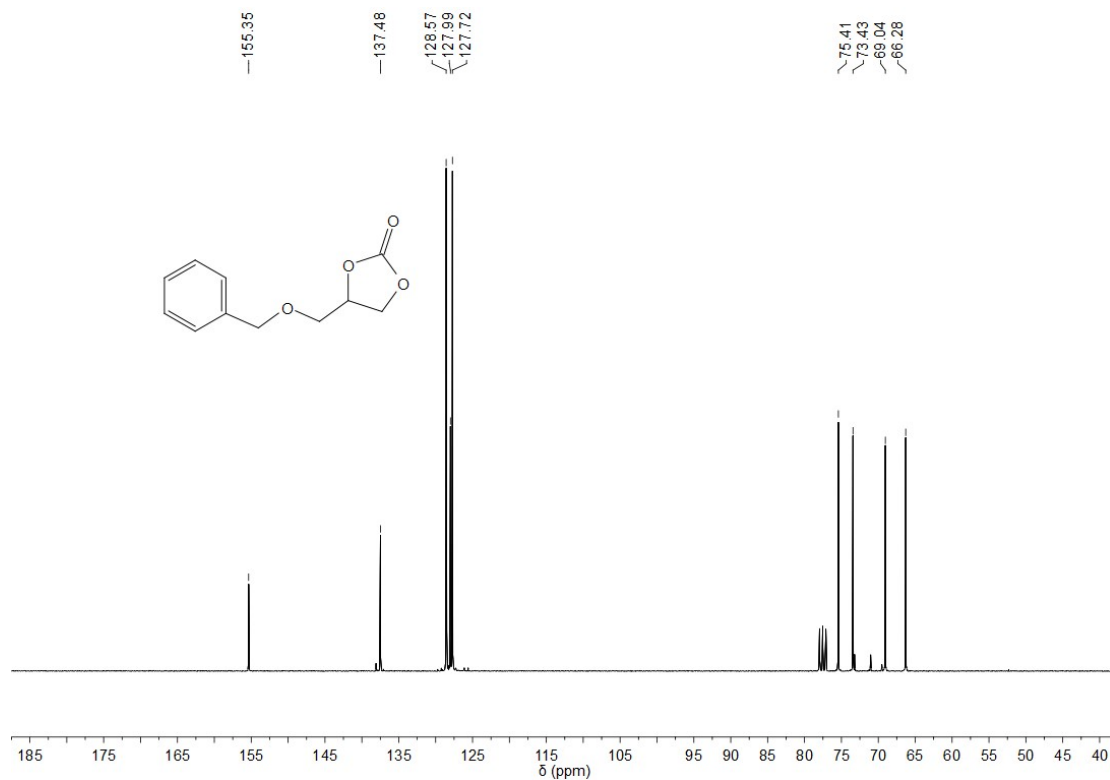

Figure S18 <sup>13</sup>C NMR of 4-((benzyloxy)methyl)-1,3-dioxolan-2-one (9b)
